# Supplementary material for: A pragmatic pipeline for drug resistance identification in Mycobacterium tuberculosis using whole genome sequencing
Source: bioRxiv or medRxiv preprint supplement (doi:10.1101/2024.04.15.24305720), 2024-04-15
Supplement: Supplementary file [file media-1.pdf]

## Supplementary materials

### Contents

|                                                                                 |   |
|---------------------------------------------------------------------------------|---|
| <b>S1 – Full column CTAB protocol</b> .....                                     | 1 |
| <b>S2 - Computer specifications for the computer used in this project</b> ..... | 1 |
| <b>S3 - List of uploaded fastq files</b> .....                                  | 1 |
| <b>S4 - Full basecalling comparison table</b> .....                             | 3 |
| <b>S5 - Full tuberculosis data analysis software comparison table</b> .....     | 5 |
| <b>S6 - Full ONT vs Illumina concordance table</b> .....                        | 7 |

### S1 – Full column CTAB protocol

500 µL of liquid culture or a loopful of solid culture was resuspended in 500 µL PBS in a 2 mL MPBio tube, heat killed, washed twice with PBS and resuspended in 100 µL TE buffer (10mM Tris pH8 and 1mM EDTA). 2 x 4 mm glass beads were added and the samples were vortexed for 45 seconds. 10 µL lysozyme (10 mg/mL) was added and the samples then incubated at 37°C for 15 minutes at 800 RPM. The samples were then transferred into 1.5 mL Eppendorf DNA LoBind tubes and 10 µL proteinase K and 3 µL RNase A added, provided with the NEB Monarch Genomic Purification Kit (T3010S, New England Biolabs). This was vortexed, 200 µL CTAB buffer (2% CTAB, 40mM EDTA, 1.4M NaCl and 100mM Tris pH8.0) added and vortexed again. The samples were incubated at 56°C for 30 minutes at 1000 RPM, then 100 µL 5M NaCl added. The tubes were centrifuged at 17,000 x *g* for 5 minutes and 200 µL of the supernatant retained, avoiding the pellet.

The Monarch Genomic Purification Kit manufacturer instructions were then followed, with these alterations: 400 µL gDNA binding buffer was added to the supernatant and vortexed for 10 seconds. The lysate/binding buffer mix was transferred to a gDNA purification column, centrifuged at 1,000 x *g* for 3 minutes and then maximum speed for 1 minute to clear the membrane. 500 µL gDNA wash buffer was added and centrifuged for 1 minute at maximum speed and then repeated. The gDNA purification column was then placed in a DNase-free 2.5 mL microfuge tube and 50-100 µL preheated 60°C gDNA elution buffer added. The tubes were incubated at room temperature for 1 minute and then centrifuged at maximum speed for 1 minute to elute the gDNA. DNA was eluted into 50 µL molecular grade water.

### S2 - Computer specifications for the computer used in this project

| Component Required | Specification                                     |
|--------------------|---------------------------------------------------|
| Operating system   | Windows 10                                        |
| Memory/RAM         | 32 GB RAM                                         |
| CPU                | Intel(R) Core(TM) i7-10700 CPU @ 2.90GHz 2.90 GHz |
| Storage            | 1 TB internal SSD                                 |
| Ports              | USB 3.0                                           |

### S3 - List of uploaded fastq files

| Isolate name        | Sequencing platform          | Sample Accession number | Experiment Accession number |
|---------------------|------------------------------|-------------------------|-----------------------------|
| TB_sensitive_1      | Oxford Nanopore Technologies | ERS16613404             | ERX11656854                 |
| TB_sensitive_2      | Oxford Nanopore Technologies | ERS16613405             | ERX11656855                 |
| TB_sensitive_3      | Oxford Nanopore Technologies | ERS16613406             | ERX11656856                 |
| TB_sensitive_4      | Oxford Nanopore Technologies | ERS16613407             | ERX11656857                 |
| TB_sensitive_5      | Oxford Nanopore Technologies | ERS16613408             | ERX11656858                 |
| TB_sensitive_6      | Oxford Nanopore Technologies | ERS16613409             | ERX11656859                 |
| TB_sensitive_7      | Oxford Nanopore Technologies | ERS16613410             | ERX11656860                 |
| TB_sensitive_8      | Oxford Nanopore Technologies | ERS16613411             | ERX11656861                 |
| TB_isoniazid_mono_1 | Oxford Nanopore Technologies | ERS16613412             | ERX11656845                 |
| TB_isoniazid_mono_2 | Oxford Nanopore Technologies | ERS16613413             | ERX11656846                 |

|                       |                              |             |             |
|-----------------------|------------------------------|-------------|-------------|
| TB_isoniazid_mono_3   | Oxford Nanopore Technologies | ERS16613415 | ERX11656847 |
| TB_isoniazid_mono_4   | Oxford Nanopore Technologies | ERS16613416 | ERX11656848 |
| TB_isoniazid_mono_5   | Oxford Nanopore Technologies | ERS16613417 | ERX11656849 |
| TB_MDR_1              | Oxford Nanopore Technologies | ERS16613418 | ERX11656850 |
| TB_MDR_2              | Oxford Nanopore Technologies | ERS16613419 | ERX11656851 |
| TB_MDR_3              | Oxford Nanopore Technologies | ERS16613420 | ERX11656852 |
| TB_MDR_4              | Oxford Nanopore Technologies | ERS16613421 | ERX11656853 |
| TB_sensitive_1_1      | Illumina                     | ERS16690010 | ERX11656882 |
| TB_sensitive_1_2      | Illumina                     | ERS16690011 | ERX11656883 |
| TB_sensitive_2_1      | Illumina                     | ERS16690012 | ERX11656884 |
| TB_sensitive_2_2      | Illumina                     | ERS16690013 | ERX11656885 |
| TB_sensitive_3_1      | Illumina                     | ERS16690014 | ERX11656886 |
| TB_sensitive_3_2      | Illumina                     | ERS16690015 | ERX11656887 |
| TB_sensitive_4_1      | Illumina                     | ERS16690016 | ERX11656888 |
| TB_sensitive_4_2      | Illumina                     | ERS16690017 | ERX11656889 |
| TB_sensitive_5_1      | Illumina                     | ERS16690018 | ERX11656890 |
| TB_sensitive_5_2      | Illumina                     | ERS16690019 | ERX11656891 |
| TB_sensitive_6_1      | Illumina                     | ERS16690020 | ERX11656892 |
| TB_sensitive_6_2      | Illumina                     | ERS16690021 | ERX11656893 |
| TB_sensitive_7_1      | Illumina                     | ERS16690022 | ERX11656894 |
| TB_sensitive_7_2      | Illumina                     | ERS16690023 | ERX11656895 |
| TB_sensitive_8_1      | Illumina                     | ERS16690024 | ERX11656896 |
| TB_sensitive_8_2      | Illumina                     | ERS16690025 | ERX11656897 |
| TB_isoniazid_mono_1_1 | Illumina                     | ERS16690026 | ERX11656864 |
| TB_isoniazid_mono_1_2 | Illumina                     | ERS16690027 | ERX11656865 |
| TB_isoniazid_mono_2_1 | Illumina                     | ERS16690028 | ERX11656866 |
| TB_isoniazid_mono_2_2 | Illumina                     | ERS16690029 | ERX11656867 |
| TB_isoniazid_mono_3_1 | Illumina                     | ERS16690030 | ERX11656868 |
| TB_isoniazid_mono_3_2 | Illumina                     | ERS16690031 | ERX11656869 |
| TB_isoniazid_mono_4_1 | Illumina                     | ERS16690032 | ERX11656870 |
| TB_isoniazid_mono_4_2 | Illumina                     | ERS16690033 | ERX11656871 |
| TB_isoniazid_mono_5_1 | Illumina                     | ERS16690034 | ERX11656872 |
| TB_isoniazid_mono_5_2 | Illumina                     | ERS16690035 | ERX11656873 |
| TB_MDR_1_1            | Illumina                     | ERS16690036 | ERX11656874 |
| TB_MDR_1_2            | Illumina                     | ERS16690037 | ERX11656875 |
| TB_MDR_2_1            | Illumina                     | ERS16690038 | ERX11656876 |
| TB_MDR_2_2            | Illumina                     | ERS16690039 | ERX11656877 |
| TB_MDR_3_1            | Illumina                     | ERS16690040 | ERX11656878 |
| TB_MDR_3_2            | Illumina                     | ERS16690041 | ERX11656879 |
| TB_MDR_4_1            | Illumina                     | ERS16690042 | ERX11656880 |
| TB_MDR_4_2            | Illumina                     | ERS16690043 | ERX11656881 |

S4 - Full basecalling comparison table

| Sample | Basecaller | Lineage | Lineage name | Rifampicin | Isoniazid | Ethambutol | Streptomycin       | Moxifloxacin | Ofloxacin | Amikacin | Capreomycin | Kanamycin | Pyrazinamide | Ethionamide | Ciprofloxacin | Fluoroquinolones | PAS | Cycloserine | Delamanid |
|--------|------------|---------|--------------|------------|-----------|------------|--------------------|--------------|-----------|----------|-------------|-----------|--------------|-------------|---------------|------------------|-----|-------------|-----------|
|        |            |         |              |            |           |            |                    |              |           |          |             |           |              |             |               |                  |     |             |           |
| S1     | F          | 2.2.1   | Beijing      | Se         | Se        | Se         | Se                 | Se           | Se        | Se       | Se          | Se        | Se           | Se          | Se            | Se               | Se  | Se          | Se        |
|        | H          | 2.2.1   | Beijing      | Se         | Se        | Se         | Se                 | Se           | Se        | Se       | Se          | Se        | Se           | Se          | Se            | Se               | Se  | Se          | Se        |
|        | S          | 2.2.1   | Beijing      | Se         | Se        | Se         | Se                 | Se           | Se        | Se       | Se          | Se        | Se           | Se          | Se            | Se               | Se  | Se          | Se        |
| S2     | F          | 4.1.2.1 | None         | Se         | Se        | Se         | rpsL<br>p.Lys43Arg | Se           | Se        | Se       | Se          | Se        | Se           | Se          | Se            | Se               | Se  | Se          | Se        |
|        | H          | 4.1.2.1 | T1           | Se         | Se        | Se         | rpsL<br>p.Lys43Arg | Se           | Se        | Se       | Se          | Se        | Se           | Se          | Se            | Se               | Se  | Se          | Se        |
|        | S          | 4.1.2.1 | T1           | Se         | Se        | Se         | rpsL<br>p.Lys43Arg | Se           | Se        | Se       | Se          | Se        | Se           | Se          | Se            | Se               | Se  | Se          | Se        |
| S3     | F          | 4.1.1.1 | X2           | Se         | Se        | Se         | Se                 | Se           | Se        | Se       | Se          | Se        | Se           | Se          | Se            | Se               | Se  | Se          | Se        |
|        | H          | 4.1.1.1 | X2           | Se         | Se        | Se         | Se                 | Se           | Se        | Se       | Se          | Se        | Se           | Se          | Se            | Se               | Se  | Se          | Se        |
|        | S          | 4.1.1.1 | X2           | Se         | Se        | Se         | Se                 | Se           | Se        | Se       | Se          | Se        | Se           | Se          | Se            | Se               | Se  | Se          | Se        |
| S4     | F          | 3       | CAS          | Se         | Se        | Se         | Se                 | Se           | Se        | Se       | Se          | Se        | Se           | Se          | Se            | Se               | Se  | Se          | Se        |
|        | H          | 4.6     | Manu2        | Se         | Se        | Se         | Se                 | Se           | Se        | Se       | Se          | Se        | Se           | Se          | Se            | Se               | Se  | Se          | Se        |
|        | S          | 4.6     | Manu2        | Se         | Se        | Se         | Se                 | Se           | Se        | Se       | Se          | Se        | Se           | Se          | Se            | Se               | Se  | Se          | Se        |
| S5     | F          | 4.3.4   | None         | Se         | Se        | Se         | Se                 | Se           | Se        | Se       | Se          | Se        | Se           | Se          | Se            | Se               | Se  | Se          | Se        |
|        | H          | 4.3.4.2 | LAM9         | Se         | Se        | Se         | Se                 | Se           | Se        | Se       | Se          | Se        | Se           | Se          | Se            | Se               | Se  | Se          | Se        |
|        | S          | 4.3.4.2 | LAM9         | Se         | Se        | Se         | Se                 | Se           | Se        | Se       | Se          | Se        | Se           | Se          | Se            | Se               | Se  | Se          | Se        |
| S6     | F          | 2.2.1   | Beijing      | Se         | Se        | Se         | Se                 | Se           | Se        | Se       | Se          | Se        | Se           | Se          | Se            | Se               | Se  | Se          | Se        |
|        | H          | 2.2.1   | Beijing      | Se         | Se        | Se         | Se                 | Se           | Se        | Se       | Se          | Se        | Se           | Se          | Se            | Se               | Se  | Se          | Se        |
|        | S          | 2.2.1   | Beijing      | Se         | Se        | Se         | Se                 | Se           | Se        | Se       | Se          | Se        | Se           | Se          | Se            | Se               | Se  | Se          | Se        |
| S7     | F          | 4.1.3   | None         | Se         | Se        | Se         | Se                 | Se           | Se        | Se       | Se          | Se        | Se           | Se          | Se            | Se               | Se  | Se          |           |

Sensitive

|    |   |           |                 |    |    |    |    |    |    |    |    |    |    |    |    |    |    |    |    |
|----|---|-----------|-----------------|----|----|----|----|----|----|----|----|----|----|----|----|----|----|----|----|
|    | H | 4.1.3     | T1              | Se | Se | Se | Se | Se | Se | Se | Se | Se | Se | Se | Se | Se | Se | Se | Se |
|    | S | 4.1.3     | T1              | Se | Se | Se | Se | Se | Se | Se | Se | Se | Se | Se | Se | Se | Se | Se | Se |
| S8 | F | 1.2.1.2.1 | EAI2-nonthaburi | Se | Se | Se | Se | Se | Se | Se | Se | Se | Se | Se | Se | Se | Se | Se | Se |
|    | H | 1.2.1.2.1 | EAI2-nonthaburi | Se | Se | Se | Se | Se | Se | Se | Se | Se | Se | Se | Se | Se | Se | Se | Se |
|    | S | 1.2.1.2.1 | EAI2-nonthaburi | Se | Se | Se | Se | Se | Se | Se | Se | Se | Se | Se | Se | Se | Se | Se | Se |

|                          |    |      |         |          |    |                                  |    |               |    |    |    |    |    |    |                                  |    |    |    |    |
|--------------------------|----|------|---------|----------|----|----------------------------------|----|---------------|----|----|----|----|----|----|----------------------------------|----|----|----|----|
| Isoniazid mono-resistant | I1 | F    | 4.6.2.2 | None     | Se | fabG1 c.-15C>T                   | Se | Se            | Se | Se | Se | Se | Se | Se | fabG1 c.-15C>T                   | Se | Se | Se | Se |
|                          |    | H    | 4.6.2.2 | Cameroon | Se | fabG1 c.-15C>T                   | Se | Se            | Se | Se | Se | Se | Se | Se | fabG1 c.-15C>T                   | Se | Se | Se | Se |
|                          |    | S    | 4.6.2.3 | Cameroon | Se | fabG1 c.-15C>T                   | Se | Se            | Se | Se | Se | Se | Se | Se | fabG1 c.-15C>T                   | Se | Se | Se | Se |
|                          | I2 | F    | 4.6.1.2 | None     | Se | fabG1 c.-15C>T, inhA p.Ile194Thr | Se | Se            | Se | Se | Se | Se | Se | Se | fabG1 c.-15C>T, inhA p.Ile194Thr | Se | Se | Se | Se |
|                          |    | H    | 4.6.1.2 | X1       | Se | fabG1 c.-15C>T, inhA p.Ile194Thr | Se | gid c.102de1G | Se | Se | Se | Se | Se | Se | fabG1 c.-15C>T, inhA p.Ile194Thr | Se | Se | Se | Se |
|                          |    | S    | 4.6.1.2 | X1       | Se | fabG1 c.-15C>T, inhA p.Ile194Thr | Se | gid c.102de1G | Se | Se | Se | Se | Se | Se | fabG1 c.-15C>T, inhA p.Ile194Thr | Se | Se | Se | Se |
|                          | I3 | F    | 4.6.2.2 | Cameroon | Se | fabG1 c.-15C>T                   | Se | Se            | Se | Se | Se | Se | Se | Se | fabG1 c.-15C>T                   | Se | Se | Se | Se |
|                          |    | H    | 4.6.2.2 | Cameroon | Se | fabG1 c.-15C>T                   | Se | Se            | Se | Se | Se | Se | Se | Se | fabG1 c.-15C>T                   | Se | Se | Se | Se |
|                          |    | S    | 4.6.2.2 | Cameroon | Se | fabG1 c.-15C>T                   | Se | Se            | Se | Se | Se | Se | Se | Se | fabG1 c.-15C>T                   | Se | Se | Se | Se |
|                          | I4 | F    | 4.6.2.2 | Cameroon | Se | fabG1 c.-15C>T                   | Se | Se            | Se | Se | Se | Se | Se | Se | fabG1 c.-15C>T                   | Se | Se | Se | Se |
|                          |    | H    | 4.6.2.2 | Cameroon | Se | fabG1 c.-15C>T                   | Se | Se            | Se | Se | Se | Se | Se | Se | fabG1 c.-15C>T                   | Se | Se | Se | Se |
|                          |    | S    | 4.6.2.2 | Cameroon | Se | fabG1 c.-15C>T                   | Se | Se            | Se | Se | Se | Se | Se | Se | fabG1 c.-15C>T                   | Se | Se | Se | Se |
|                          | I5 | Fast | 4.6.2.2 | Cameroon | Se | fabG1 c.-15C>T                   | Se | Se            | Se | Se | Se | Se | Se | Se | fabG1 c.-15C>T                   | Se | Se | Se | Se |
|                          |    | HAC  | 4.6.2.2 | Cameroon | Se | fabG1 c.-15C>T                   | Se | Se            | Se | Se | Se | Se | Se | Se | fabG1 c.-15C>T                   | Se | Se | Se | Se |
|                          |    | SUP  | 4.6.2.2 | Cameroon | Se | fabG1 c.-15C>T                   | Se | Se            | Se | Se | Se | Se | Se | Se | fabG1 c.-15C>T                   | Se | Se | Se | Se |

|     |    |   |         |      |                  |                  |                  |                 |    |    |    |    |    |                 |    |    |    |    |    |
|-----|----|---|---------|------|------------------|------------------|------------------|-----------------|----|----|----|----|----|-----------------|----|----|----|----|----|
| MDR | M1 | F | 4.1.2.1 | None | rpoB p.Ser450Leu | katG p.Ser315Thr | embB p.Met306Ile | rpsL p.Lys43Arg | Se | Se | Se | Se | Se | pncA p.Leu85Pro | Se | Se | Se | Se | Se |
|     |    | H | 4.1.2.1 | H1   | rpoB p.Ser450Leu | katG p.Ser315Thr | embB p.Met306Ile | rpsL p.Lys43Arg | Se | Se | Se | Se | Se | pncA p.Leu85Pro | Se | Se | Se | Se | Se |
|     |    | S | 4.1.2.1 | H1   | rpoB p.Ser450Leu | katG p.Ser315Thr | embB p.Met306Ile | rpsL p.Lys43Arg | Se | Se | Se | Se | Se | pncA p.Leu85Pro | Se | Se | Se | Se | Se |

|    |   |       |                            |                                       |                                     |                     |                    |    |    |    |    |    |                  |    |                |    |    |    |    |    |
|----|---|-------|----------------------------|---------------------------------------|-------------------------------------|---------------------|--------------------|----|----|----|----|----|------------------|----|----------------|----|----|----|----|----|
| M2 | F | 2.2.1 | Beijing                    | rpoB p.Ser450Leu,<br>rpoB p.Glu761Asp | katG p.Ser315Thr                    | embB<br>p.Asp354Ala | Se                 | Se | Se | Se | Se | Se | eis c.-<br>37G>T | Se | ethA c.-7T>C   | Se | Se | Se | Se | Se |
|    | H | 2.2.1 | Beijing                    | rpoB p.Ser450Leu,<br>rpoB p.Glu761Asp | katG p.Ser315Thr                    | embB<br>p.Asp354Ala | Se                 | Se | Se | Se | Se | Se | eis c.-<br>37G>T | Se | ethA c.-7T>C   | Se | Se | Se | Se | Se |
|    | S | 2.2.1 | Beijing                    | rpoB p.Ser450Leu,<br>rpoB p.Glu761Asp | katG p.Ser315Thr                    | embB<br>p.Asp354Ala | Se                 | Se | Se | Se | Se | Se | eis c.-<br>37G>T | Se | ethA c.-7T>C   | Se | Se | Se | Se | Se |
| M3 | F | 2.2.1 | Beijing                    | rpoB p.Ser450Leu,<br>rpoB p.Glu761Asp | katG p.Ser315Thr                    | embB<br>p.Asp354Ala | Se                 | Se | Se | Se | Se | Se | eis c.-<br>37G>T | Se | ethA c.-7T>C   | Se | Se | Se | Se | Se |
|    | H | 2.2.1 | Beijing                    | rpoB p.Ser450Leu,<br>rpoB p.Glu761Asp | katG p.Ser315Thr                    | embB<br>p.Asp354Ala | Se                 | Se | Se | Se | Se | Se | eis c.-<br>37G>T | Se | ethA c.-7T>C   | Se | Se | Se | Se | Se |
|    | S | 2.2.1 | Beijing                    | rpoB p.Ser450Leu,<br>rpoB p.Glu761Asp | katG p.Ser315Thr                    | embB<br>p.Asp354Ala | Se                 | Se | Se | Se | Se | Se | eis c.-<br>37G>T | Se | ethA c.-7T>C   | Se | Se | Se | Se | Se |
| M4 | F | 4.2.1 | Euro-<br>American<br>(TUR) | rpoB p.Ser450Leu,<br>rpoC p.Asp485Asn | inhA c.-154G>A, katG<br>p.Ser315Thr | Se                  | rpsL<br>p.Lys88Arg | Se | Se | Se | Se | Se | Se               | Se | inhA c.-154G>A | Se | Se | Se | Se | Se |
|    | H | 4.2.1 | Ural-1                     | rpoB p.Ser450Leu,<br>rpoC p.Asp485Asn | inhA c.-154G>A, katG<br>p.Ser315Thr | Se                  | rpsL<br>p.Lys88Arg | Se | Se | Se | Se | Se | Se               | Se | inhA c.-154G>A | Se | Se | Se | Se | Se |
|    | S | 4.2.1 | Ural-1                     | rpoB p.Ser450Leu,<br>rpoC p.Asp485Asn | inhA c.-154G>A, katG<br>p.Ser315Thr | Se                  | rpsL<br>p.Lys88Arg | Se | Se | Se | Se | Se | Se               | Se | inhA c.-154G>A | Se | Se | Se | Se | Se |

F=fast basecalling, H= high accuracy basecalling, S= super high accuracy basecalling, Se=sensitive

### S5 - Full tuberculosis data analysis software comparison table

| Sample | Software | Lineage | Lineage name | Rifampicin | Isoniazid | Ethambutol | Streptomycin       | Moxifloxacin | Ofloxacin | Amikacin | Capreomycin | Kanamycin | Pyrazinamide | Ethionamide | Ciprofloxacin | Fluoroquinolones | PAS | Cycloserine | Delamanid |
|--------|----------|---------|--------------|------------|-----------|------------|--------------------|--------------|-----------|----------|-------------|-----------|--------------|-------------|---------------|------------------|-----|-------------|-----------|
| S1     | T        | 2.2.1   | Beijing      | S          | S         | S          | S                  | S            | S         | S        | S           | S         | S            | S           | S             | S                | S   | S           | S         |
|        | M        | 2.2.10  | n/a          | S          | S         | S          | S                  | S            | S         | S        | S           | S         | S            | NT          | S             | NT               | NT  | NT          | NT        |
| S2     | T        | 4.1.2.1 | T1           | S          | S         | S          | rpsL<br>p.Lys43Arg | S            | S         | S        | S           | S         | S            | S           | S             | S                | S   | S           | S         |
|        | M        | 4.1.2.1 | n/a          | S          | S         | S          | rpsL<br>p.Lys43Arg | S            | S         | S        | S           | S         | S            | NT          | S             | NT               | NT  | NT          | NT        |

|    |   |               |                 |   |                                     |   |   |   |   |   |   |   |   |   |                                  |   |    |    |    |    |
|----|---|---------------|-----------------|---|-------------------------------------|---|---|---|---|---|---|---|---|---|----------------------------------|---|----|----|----|----|
| S3 | T | 4.1.1.1       | X2              | S | S                                   | S | S | S | S | S | S | S | S | S | S                                | S | S  | S  | S  |    |
|    | M | 4.1.1.1       | n/a             | S | S                                   | S | S | S | S | S | S | S | S | S | NT                               | S | NT | NT | NT | NT |
| S4 | T | 4.6           | Manu2           | S | S                                   | S | S | S | S | S | S | S | S | S | S                                | S | S  | S  | S  |    |
|    | M | 3 and 4.6.2.2 | n/a             | S | C in gene fabG1                     | S | S | S | S | S | S | S | S | S | NT                               | S | NT | NT | NT | NT |
| S5 | T | 4.3.4         | LAM9            | S | S                                   | S | S | S | S | S | S | S | S | S | S                                | S | S  | S  | S  |    |
|    | M | 4.3.4.2       | n/a             | S | S                                   | S | S | S | S | S | S | S | S | S | NT                               | S | NT | NT | NT | NT |
| S6 | T | 2.2.1         | Beijing         | S | S                                   | S | S | S | S | S | S | S | S | S | S                                | S | S  | S  | S  |    |
|    | M | 2.2           | n/a             | S | S                                   | S | S | S | S | S | S | S | S | S | NT                               | S | NT | NT | NT | NT |
| S7 | T | 4.1.3         | T1              | S | S                                   | S | S | S | S | S | S | S | S | S | S                                | S | S  | S  | S  |    |
|    | M | 4.1.3         | n/a             | S | S                                   | S | S | S | S | S | S | S | S | S | NT                               | S | NT | NT | NT | NT |
| S8 | T | 1.2.1.2.1     | EAI2-nonthaburi | S | S                                   | S | S | S | S | S | S | S | S | S | S                                | S | S  | S  | S  |    |
|    | M | 1.2.1         | n/a             | S | S                                   | S | S | S | S | S | S | S | S | S | S                                | S | S  | S  | S  | S  |
| I1 | T | 4.6.2.2       | Cameroon        | S | fabG1 c.-15C>T                      | S | S | S | S | S | S | S | S | S | fabG1 c.-15C>T                   | S | S  | S  | S  | S  |
|    | M | 4.6.2.2       | n/a             | S | C in gene fabG1                     | S | S | S | S | S | S | S | S | S | NT                               | S | NT | NT | NT | NT |
| I2 | T | 4.6.1.2       | X1              | S | fabG1 c.-15C>T, inhA p.Ile194Thr    | S | S | S | S | S | S | S | S | S | fabG1 c.-15C>T, inhA p.Ile194Thr | S | S  | S  | S  | S  |
|    | M | 4.6.1.2       | n/a             | S | inhA p.Ile194Thr<br>C in gene fabG1 | S | S | S | S | S | S | S | S | S | NT                               | S | NT | NT | NT | NT |
| I3 | T | 4.6.2.2       | Cameroon        | S | fabG1 c.-15C>T                      | S | S | S | S | S | S | S | S | S | fabG1 c.-15C>T                   | S | S  | S  | S  | S  |
|    | M | 4.6.2.2       | n/a             | S | C in gene fabG1                     | S | S | S | S | S | S | S | S | S | NT                               | S | NT | NT | NT | NT |
| I4 | T | 4.6.2.2       | Cameroon        | S | fabG1 c.-15C>T                      | S | S | S | S | S | S | S | S | S | fabG1 c.-15C>T                   | S | S  | S  | S  | S  |
|    | M | 4.6.2.2       | n/a             | S | C in gene fabG1                     | S | S | S | S | S | S | S | S | S | NT                               | S | NT | NT | NT | NT |
| I5 | T | 4.6.2.2       | Cameroon        | S | fabG1 c.-15C>T                      | S | S | S | S | S | S | S | S | S | fabG1 c.-15C>T                   | S | S  | S  | S  | S  |

Isoniazid mono resistance

|     |    |         |         |         |                                    |                                  |                    |                 |   |   |   |   |              |                 |                |   |    |    |    |    |
|-----|----|---------|---------|---------|------------------------------------|----------------------------------|--------------------|-----------------|---|---|---|---|--------------|-----------------|----------------|---|----|----|----|----|
|     | M  | 4.6.2.2 | n/a     | S       | C in gene fabG1                    | S                                | S                  | S               | S | S | S | S | S            | S               | NT             | S | NT | NT | NT | NT |
| MDR | M1 | T       | 4.1.2.1 | H1      | rpoB p.Ser450Leu                   | katG p.Ser315Thr                 | M306I in gene embB | rpsL p.Lys43Arg | S | S | S | S | S            | pncA p.Leu85Pro | S              | S | S  | S  | S  | S  |
|     |    | M       | 4.1.2.1 | n/a     | rpoB p.Ser450Leu                   | katG p.Ser315Thr                 | M306I in gene embB | rpsL p.Lys43Arg | S | S | S | S | S            | pncA p.Leu85Pro | NT             | S | NT | NT | NT | NT |
|     | M2 | T       | 2.2.1   | Beijing | rpoB p.Ser450Leu, rpoB p.Glu761Asp | katG p.Ser315Thr                 | embB p.Asp354Ala   | S               | S | S | S | S | eis c.-37G>T | S               | ethA c.-7T>C   | S | S  | S  | S  | S  |
|     |    | M       | 2.2.10  | n/a     | rpoB p.Ser450Leu, rpoB p.Glu761Asp | katG p.Ser315Thr                 | embB p.Asp354Ala   | S               | S | S | S | S | S            | S               | NT             | S | NT | NT | NT | NT |
|     | M3 | T       | 2.2.1   | Beijing | rpoB p.Ser450Leu, rpoB p.Glu761Asp | katG p.Ser315Thr                 | embB p.Asp354Ala   | S               | S | S | S | S | eis c.-37G>T | S               | ethA c.-7T>C   | S | S  | S  | S  | S  |
|     |    | M       | 2.2.10  | n/a     | S450L in gene rpoB                 | katG p.Ser315Thr                 | embB p.Asp354Ala   | S               | S | S | S | S | S            | S               | NT             | S | NT | NT | NT | NT |
|     | M4 | T       | 4.2.1   | Ural-1  | rpoB p.Ser450Leu, rpoC p.Asp485Asn | inhA c.-154G>A, katG p.Ser315Thr | S                  | rpsL p.Lys88Arg | S | S | S | S | S            | S               | inhA c.-154G>A | S | S  | S  | S  | S  |
|     |    | M       | 4.2.1   | n/a     | S                                  | katG p.Ser315Thr                 | S                  | S               | S | S | S | S | S            | S               | NT             | S | NT | NT | NT | NT |

T= TB-Profiler, M= Mykrobe, S= sensitive, NT = not tested

### S6 - Full ONT vs Illumina concordance table

|           |    | Lineage | Lineage name | Rifampicin | Isoniazid | Ethambutol | Streptomycin | Moxifloxacin | Ofloxacin | Amikacin | Capreomycin | Kanamycin | Pyrazinamide | Ethionamide | Ciprofloxacin | Fluoroquinolones | PAS | Cycloserine | Delaminid |
|-----------|----|---------|--------------|------------|-----------|------------|--------------|--------------|-----------|----------|-------------|-----------|--------------|-------------|---------------|------------------|-----|-------------|-----------|
| Sensitive | S1 | P       | n/a          | n/a        | S         | S          | S            | NT           | NT        | NT       | NT          | NT        | NT           | NT          | NT            | NT               | NT  | NT          | NT        |
|           |    | O       | 2.2.1        | Beijing    | S         | S          | S            | S            | S         | S        | S           | S         | S            | S           | S             | S                | S   | S           | S         |
|           |    | I       | 2.2.1        | Beijing    | S         | S          | S            | S            | S         | S        | S           | S         | S            | S           | S             | S                | S   | S           | S         |
|           | S2 | P       | n/a          | n/a        | S         | S          | S            | S            | NT        | NT       | NT          | NT        | NT           | NT          | NT            | NT               | NT  | NT          | NT        |

|                   |   |           |                     |   |                |   |                    |    |    |    |    |    |    |    |                    |    |    |    |    |
|-------------------|---|-----------|---------------------|---|----------------|---|--------------------|----|----|----|----|----|----|----|--------------------|----|----|----|----|
|                   | O | 4.1.2.1   | T1                  | S | S              | S | rpsL<br>p.Lys43Arg | S  | S  | S  | S  | S  | S  | S  | S                  | S  | S  | S  | S  |
|                   | I | 4.1.2.1   | T1                  | S | S              | S | rpsL<br>p.Lys43Arg | S  | S  | S  | S  | S  | S  | S  | S                  | S  | S  | S  | S  |
|                   |   |           |                     |   |                |   |                    |    |    |    |    |    |    |    |                    |    |    |    |    |
| S3                | P | n/a       | n/a                 | S | S              | S | S                  | NT | NT | NT | NT | NT | NT | NT | NT                 | NT | NT | NT | NT |
|                   | O | 4.1.1.1   | X2                  | S | S              | S | S                  | S  | S  | S  | S  | S  | S  | S  | S                  | S  | S  | S  | S  |
|                   | I | 4.1.1.1   | X2                  | S | S              | S | S                  | S  | S  | S  | S  | S  | S  | S  | S                  | S  | S  | S  | S  |
|                   |   |           |                     |   |                |   |                    |    |    |    |    |    |    |    |                    |    |    |    |    |
| S4                | P | n/a       | n/a                 | S | S              | S | S                  | NT | NT | NT | NT | NT | NT | NT | NT                 | NT | NT | NT | NT |
|                   | O | 3 and 4.6 | CAS,<br>Manu2       | S | S              | S | S                  | S  | S  | S  | S  | S  | S  | S  | S                  | S  | S  | S  | S  |
|                   | I | 3         | CAS1-Delhi          | S | S              | S | S                  | S  | S  | S  | S  | S  | S  | S  | S                  | S  | S  | S  | S  |
|                   |   |           |                     |   |                |   |                    |    |    |    |    |    |    |    |                    |    |    |    |    |
| S5                | P | n/a       | n/a                 | S | S              | S | S                  | NT | NT | NT | NT | NT | NT | NT | NT                 | NT | NT | NT | NT |
|                   | O | 4.3.4     | LAM9                | S | S              | S | S                  | S  | S  | S  | S  | S  | S  | S  | S                  | S  | S  | S  | S  |
|                   | I | 4.3.4.2   | LAM9                | S | S              | S | S                  | S  | S  | S  | S  | S  | S  | S  | S                  | S  | S  | S  | S  |
|                   |   |           |                     |   |                |   |                    |    |    |    |    |    |    |    |                    |    |    |    |    |
| S6                | P | n/a       | n/a                 | S | S              | S | S                  | NT | NT | NT | NT | NT | NT | NT | NT                 | NT | NT | NT | NT |
|                   | O | 2.2.1     | Beijing             | S | S              | S | S                  | S  | S  | S  | S  | S  | S  | S  | S                  | S  | S  | S  | S  |
|                   | I | 2.2.1     | Beijing             | S | S              | S | S                  | S  | S  | S  | S  | S  | S  | S  | S                  | S  | S  | S  | S  |
|                   |   |           |                     |   |                |   |                    |    |    |    |    |    |    |    |                    |    |    |    |    |
| S7                | P | n/a       | n/a                 | S | S              | S | S                  | NT | NT | NT | NT | NT | NT | NT | NT                 | NT | NT | NT | NT |
|                   | O | 4.1.3     | T1                  | S | S              | S | S                  | S  | S  | S  | S  | S  | S  | S  | S                  | S  | S  | S  | S  |
|                   | I | 4.1.3     | T1                  | S | S              | S | S                  | S  | S  | S  | S  | S  | S  | S  | S                  | S  | S  | S  | S  |
|                   |   |           |                     |   |                |   |                    |    |    |    |    |    |    |    |                    |    |    |    |    |
| S8                | P | n/a       | n/a                 | S | S              | S | S                  | NT | NT | NT | NT | NT | NT | NT | NT                 | NT | NT | NT | NT |
|                   | O | 1.2.1.2.1 | EAI2-<br>nonthaburi | S | S              | S | S                  | S  | S  | S  | S  | S  | S  | S  | S                  | S  | S  | S  | S  |
|                   | I | 1.2.1.2.1 | EAI2-<br>nonthaburi | S | S              | S | S                  | S  | S  | S  | S  | S  | S  | S  | S                  | S  | S  | S  | S  |
|                   |   |           |                     |   |                |   |                    |    |    |    |    |    |    |    |                    |    |    |    |    |
| Isoniazid<br>mono | P | n/a       | n/a                 | S | R              | S | S                  | NT | NT | NT | NT | NT | NT | NT | NT                 | NT | NT | NT | NT |
|                   | O | 4.6.2.2   | Cameroon            | S | fabG1 c.-15C>T | S | S                  | S  | S  | S  | S  | S  | S  | S  | fabG1 c.-<br>15C>T | S  | S  | S  | S  |
|                   | I | 4.6.2.2   | Cameroon            | S | fabG1 c.-15C>T | S | S                  | S  | S  | S  | S  | S  | S  | S  | fabG1 c.-<br>15C>T | S  | S  | S  | S  |



|     |    |         |          |                                       |                                     |                     |                     |                    |    |    |    |                  |    |                                         |    |    |    |    |    |
|-----|----|---------|----------|---------------------------------------|-------------------------------------|---------------------|---------------------|--------------------|----|----|----|------------------|----|-----------------------------------------|----|----|----|----|----|
| I2  | P  | n/a     | n/a      | S                                     | R                                   | S                   | S                   | NT                 | NT | NT | NT | NT               | NT | NT                                      | NT | NT | NT | NT | NT |
|     | O  | 4.6.1.2 | X1       | S                                     | fabG1 c.-15C>T,<br>inhA p.Ile194Thr | S                   | gid<br>c.102de1G    | S                  | S  | S  | S  | S                | S  | fabG1 c.-<br>15C>T, inhA<br>p.Ile194Thr | S  | S  | S  | S  | S  |
|     | I  | 4.6.1.2 | X1       | S                                     | fabG1 c.-15C>T,<br>inhA p.Ile194Thr | S                   | gid c.102delG       | S                  | S  | S  | S  | S                | S  | fabG1 c.-<br>15C>T, inhA<br>p.Ile194Thr | S  | S  | S  | S  | S  |
| I3  | P  | n/a     | n/a      | S                                     | R                                   | S                   | S                   | NT                 | NT | NT | NT | NT               | NT | NT                                      | NT | NT | NT | NT | NT |
|     | O  | 4.6.2.2 | Cameroon | S                                     | fabG1 c.-15C>T                      | S                   | S                   | S                  | S  | S  | S  | S                | S  | fabG1 c.-<br>15C>T                      | S  | S  | S  | S  | S  |
|     | I  | 4.6.2.2 | Cameroon | S                                     | fabG1 c.-15C>T                      | S                   | S                   | S                  | S  | S  | S  | S                | S  | fabG1 c.-<br>15C>T                      | S  | S  | S  | S  | S  |
| I4  | P  | n/a     | n/a      | S                                     | R                                   | S                   | S                   | NT                 | NT | NT | NT | NT               | NT | NT                                      | NT | NT | NT | NT | NT |
|     | O  | 4.6.2.2 | Cameroon | S                                     | fabG1 c.-15C>T                      | S                   | S                   | S                  | S  | S  | S  | S                | S  | fabG1 c.-<br>15C>T                      | S  | S  | S  | S  | S  |
|     | I  | 4.6.2.2 | Cameroon | S                                     | fabG1 c.-15C>T                      | S                   | S                   | S                  | S  | S  | S  | S                | S  | fabG1 c.-<br>15C>T                      | S  | S  | S  | S  | S  |
| I5  | P  | n/a     | n/a      | S                                     | R                                   | S                   | S                   | NT                 | NT | NT | NT | NT               | NT | NT                                      | NT | NT | NT | NT | NT |
|     | O  | 4.6.2.2 | Cameroon | S                                     | fabG1 c.-15C>T                      | S                   | S                   | S                  | S  | S  | S  | S                | S  | fabG1 c.-<br>15C>T                      | S  | S  | S  | S  | S  |
|     | I  | 4.6.2.2 | Cameroon | S                                     | fabG1 c.-15C>T                      | S                   | S                   | S                  | S  | S  | S  | S                | S  | fabG1 c.-<br>15C>T                      | S  | S  | S  | S  | S  |
| MDR | M1 | P       | n/a      | n/a                                   | R                                   | R                   | S                   | R                  | NT | NT | NT | NT               | NT | R                                       | NT | NT | NT | NT | NT |
|     |    | O       | 4.1.2.1  | H1                                    | rpoB p.Ser450Leu                    | katG p.Ser315Thr    | embB<br>p.Met306Ile | rpsL<br>p.Lys43Arg | S  | S  | S  | S                | S  | pncA<br>p.Leu85Pro                      | S  | S  | S  | S  | S  |
|     |    | I       | 4.1.2.1  | H1                                    | rpoB p.Ser450Leu                    | katG p.Ser315Thr    | embB<br>p.Met306Ile | rpsL<br>p.Lys43Arg | S  | S  | S  | S                | S  | pncA<br>p.Leu85Pro                      | S  | S  | S  | S  | S  |
| M2  | P  | n/a     | n/a      | R                                     | R                                   | S                   | R                   | NT                 | NT | NT | NT | NT               | R  | NT                                      | NT | NT | NT | NT | NT |
|     | O  | 2.2.1   | Beijing  | rpoB p.Ser450Leu,<br>rpoB p.Glu761Asp | katG p.Ser315Thr                    | embB<br>p.Asp354Ala | S                   | S                  | S  | S  | S  | eis c.-<br>37G>T | S  | ethA c.-7T>C                            | S  | S  | S  | S  | S  |
|     | I  | 2.2.1   | Beijing  | rpoB p.Ser450Leu,<br>rpoB p.Glu761Asp | katG p.Ser315Thr                    | embB<br>p.Asp354Ala | S                   | S                  | S  | S  | S  | eis c.-<br>37G>T | S  | ethA c.-7T>C                            | S  | S  | S  | S  | S  |
| M3  | P  | n/a     | n/a      | R                                     | R                                   | S                   | S                   | NT                 | NT | NT | NT | NT               | R  | NT                                      | NT | NT | NT | NT | NT |
|     | O  | 2.2.1   | Beijing  | rpoB p.Ser450Leu,<br>rpoB p.Glu761Asp | katG p.Ser315Thr                    | embB<br>p.Asp354Ala | S                   | S                  | S  | S  | S  | eis c.-<br>37G>T | S  | ethA c.-7T>C                            | S  | S  | S  | S  | S  |

|   |       |        |                                       |                                       |                                     |                     |                    |    |    |    |    |                  |                    |                    |    |    |    |    |    |
|---|-------|--------|---------------------------------------|---------------------------------------|-------------------------------------|---------------------|--------------------|----|----|----|----|------------------|--------------------|--------------------|----|----|----|----|----|
|   | I     | 2.2.1  | Beijing                               | rpoB p.Ser450Leu,<br>rpoB p.Glu761Asp | katG p.Ser315Thr                    | embB<br>p.Asp354Ala | S                  | S  | S  | S  | S  | eis c.-<br>37G>T | S                  | ethA c.-7T>C       | S  | S  | S  | S  | S  |
|   |       |        |                                       |                                       |                                     |                     |                    |    |    |    |    |                  |                    |                    |    |    |    |    |    |
|   | P     | n/a    | n/a                                   | R                                     | R                                   | S                   | R                  | NT | NT | NT | NT | NT               | S                  | NT                 | NT | NT | NT | NT | NT |
|   | O     | 4.2.1  | Ural-1                                | rpoB p.Ser450Leu,<br>rpoC p.Asp485Asn | inhA c.-154G>A,<br>katG p.Ser315Thr | S                   | rpsL<br>p.Lys88Arg | S  | S  | S  | S  | S                | S                  | inhA c.-<br>154G>A | S  | S  | S  | S  | S  |
| I | 4.2.1 | Ural-1 | rpoB p.Ser450Leu,<br>rpoC p.Asp485Asn | inhA c.-154G>A,<br>katG p.Ser315Thr   | S                                   | rpsL<br>p.Lys88Arg  | S                  | S  | S  | S  | S  | S                | inhA c.-<br>154G>A | S                  | S  | S  | S  | S  |    |

P = phenotypic, O = Oxford Nanopore Technologies WGS, I = Illumina WGS, NT = Not tested, R = resistant, S = sensitive. Only resistance mutations of final confidence grading of  $\geq 3$  according to the WHO's Catalogue of mutations in Mycobacterium tuberculosis complex and their association with drug resistance.
